# Supplementary material for: Successes and Challenges of HIV Mentoring in Malawi: The Mentee Perspective
Source: PubMed Central journal article supplement (PMC4924818; doi:10.1371/journal.pone.0158258), 2016-06-28
Supplement: pone.0158258.s002.pdf [file pone.0158258.s002.pdf]

| 2013 Health Center Dashboard                                                                                          |         |         |         |         |            |
|-----------------------------------------------------------------------------------------------------------------------|---------|---------|---------|---------|------------|
| Indicator                                                                                                             | 1st QTR | 2nd QTR | 3rd QTR | 4th QTR | CUMULATIVE |
| # of newly registered ANC clients                                                                                     | 402     | 309     | 254     | 434     | 1399       |
| Percentage of pregnant women with known HIV status in ANC                                                             | 67%     | 90%     | 99%     | 81%     | 82%        |
| Percentage of HIV positive women seen in ANC                                                                          | 6%      | 4%      | 4%      | 4%      | 5%         |
| Percentage of HIV+ pregnant women who received ARVs to reduce risk of MTCT of HIV in ANC                              | 100%    | 92%     | 70%     | 100%    | 92%        |
| Percentage of women registered for delivery who had known HIV status during the pregnancy                             | 96%     | 95%     | 99%     | 98%     | 96%        |
| # of previously untested women who were tested in Maternity                                                           | 5       | 8       | 1       | 5       | 19         |
| Percentage of previously untested women who were tested in Maternity                                                  | 42%     | 62%     | 100%    | 100%    | 61%        |
| Percentage of women who registered in Maternity and were tested for HIV either in ANC or Maternity.                   | 97%     | 98%     | 100%    | 100%    | 99%        |
| Percentage of HIV positive women (previous or new) who received ART for PMTCT                                         | 100%    | 100%    | 100%    | 100%    | 100%       |
| # of infants born to HIV (+) women                                                                                    | 15      | 11      | 4       | 9       | 39         |
| Percentage of exposed children born at site who are registered for EID                                                | 80%     | 45%     | 0%      | 0%      | 44%        |
| QTR cohort of active exposed infants registered (includes transfer ins)                                               | 4       | 9       | 6       | 1       | 20         |
| Percentage of exposed infants who completed 6 weeks of NVP for PMTCT                                                  | 100%    | 89%     | 83%     | 100%    | 90%        |
| Percentage of infants born to HIV+ pregnant women who were started on CPT at 6-8 weeks of life                        | 0%      | 22%     | 100%    | 0%      | 40%        |
| Percentage of infants born to HIV+ women who were started on CPT within 3 months of birth                             | 0%      | 22%     | 100%    | 0%      | 40%        |
| Percentage of infants born to HIV+ women who received HIV-PCR testing at 6-8 weeks of life                            | 75%     | 0%      | 0%      | 0%      | 15%        |
| Percentage of infants born to HIV+ women who received HIV-PCR testing within 3 months of birth.                       | 100%    | 0%      | 0%      | 0%      | 20%        |
| Total # of DBS samples sent during the cohort months regardless of the age of the infant                              | 3       | 9       | 5       | 7       | 24         |
| Percentage of HIV-PCR sample results received at healthcare facility withing one month from the date of collection    | 67%     | 0%      | 0%      | 14%     | 13%        |
| Percentage of positive HIV-PCR samples                                                                                | 0%      | 0%      | 0%      | 0%      | 0%         |
| Percentage of exposed infants who had any HIV test (rapid HIV or HIV-PCR) by 12 months of age (includes transfer-ins) | 71%     | 73%     | 100%    | 75%     | 75%        |
| Percentage of positive HIV tests at site                                                                              | 6%      | 6%      | 5%      | 4%      | 5%         |
| First time initiations at site                                                                                        | 29      | 24      | 22      | 42      | 117        |
| Percentage of patients newly initiated on ARVs based on CD4 count versus clinical staging                             | 20%     | 29%     | 42%     | 70%     | 47%        |
| Percentage patients who died within 3 months of starting ART                                                          | 0%      | 0%      | 8%      | 0%      | 2%         |
| Percentage of adults and children known to be alive and on treatment 12 months after initiation of ART                | 100%    | 98%     | 100%    | 65%     | 93%        |
| Percent of HIV+ persons receiving cotrimoxazole prophylaxis                                                           | 100%    | 100%    | 96%     | 89%     |            |
| Percentage of HIV+ patients who were screened for TB in HIV care or treatment settings                                | 100%    | 100%    | 78%     | 91%     | XXX        |
| # of eligible HIV positive patients who received Isoniazid Preventative Therapy (IPT) at their last visit             | 6       | 12      | 4       | 14      | 14         |
